# Supplementary material
Source: PubMed Central journal article supplement (PMC3530010)

## SUPPLEMENTAL MATERIAL

Supplemental Table 1: Blood pressure and blood gases of mice in which CBF was measured.

|        | Genotype | Treatment          | Sampling | Stimuli                                                       | N | MAP (mmHg) | pCO <sub>2</sub> (mmHg) | pO <sub>2</sub> (mmHg) | pH        |
|--------|----------|--------------------|----------|---------------------------------------------------------------|---|------------|-------------------------|------------------------|-----------|
| Fig. 3 | WT       | Vehicle            | Before   | - Whisker<br>- ACh<br>- Bradykinin<br>- A23187<br>- Adenosine | 5 | 82±2       | 33.5±2.5                | 121.7±9.2              | 7.37±0.02 |
|        |          |                    | After    |                                                               |   | 82±3       | 32.2±2.9                | 126.7±9.3              | 7.36±0.03 |
|        | Tg-SwDI  |                    | Before   |                                                               | 5 | 79±2       | 33.8±2.5                | 136.3±9.8              | 7.39±0.02 |
|        |          |                    | After    |                                                               |   | 80±2       | 29.4±1.8                | 133.8±9.2              | 7.40±0.02 |
|        | Tg-2576  |                    | Before   |                                                               | 5 | 80±1       | 34.6±1.7                | 138.8±4.9              | 7.37±0.02 |
|        |          |                    | After    |                                                               |   | 80±2       | 34.4±1.8                | 133.8±4.6              | 7.37±0.02 |
| Fig. 4 | WT       | Vehicle            | Before   | - Whisker<br>- ACh<br>- Adenosine                             | 5 | 80±3       | 34.0±1.7                | 132.5±7.1              | 7.39±0.02 |
|        |          |                    | After    |                                                               |   | 82±2       | 33.6±1.6                | 130.0±5.5              | 7.39±0.02 |
|        |          | Aβ <sub>1-40</sub> | Before   |                                                               | 5 | 83±2       | 35.2±2.3                | 130.1±5.3              | 7.37±0.01 |
|        |          |                    | After    |                                                               |   | 83±1       | 32.0±1.8                | 132.7±5.9              | 7.39±0.02 |
|        | Tg-SwDI  | Vehicle            | Before   | - Whisker<br>- ACh<br>- Adenosine                             | 5 | 81±4       | 34.1±2.1                | 135.3±5.9              | 7.37±0.02 |
|        |          |                    | After    |                                                               |   | 82±1       | 32.5±1.6                | 133.6±5.1              | 7.39±0.02 |
|        |          | Aβ <sub>1-40</sub> | Before   |                                                               | 5 | 83±4       | 34.9±1.5                | 134.1±5.3              | 7.37±0.02 |
|        |          |                    | After    |                                                               |   | 81±3       | 33.3±2.8                | 136.6±7.3              | 7.36±0.02 |
|        | Tg-2576  | Vehicle            | Before   | - Whisker<br>- ACh<br>- Adenosine                             | 5 | 81±1       | 33.2±1.5                | 136.8±3.8              | 7.37±0.01 |
|        |          |                    | After    |                                                               |   | 80±2       | 33.5±1.7                | 135.3±4.0              | 7.38±0.01 |
|        |          | Aβ <sub>1-40</sub> | Before   |                                                               | 5 | 80±2       | 34.5±1.5                | 134.5±4.5              | 7.39±0.01 |
|        |          |                    | After    |                                                               |   | 81±2       | 31.2±1.7                | 136.0±3.9              | 7.37±0.01 |

**Supplemental figure 1:** Increases in CBF elicited by bradykinin (A) and A23187 (B) (\* $p < 0.05$  from WT; #  $p < 0.05$  from WT and Tg-SwDI; Analysis of variance and Tukey's test;  $n = 5$ /group).

**Supplemental figure 2:** Effect of i.c. infusion of A $\beta$ 1-40 on the increase in CBF evoked by adenosine in WT (A), Tg-SwDI (B), and Tg-2576 (C) ( $p > 0.05$  from before; Analysis of variance and Tukey's test;  $n = 5$ /group).

**Supplemental figure 1**

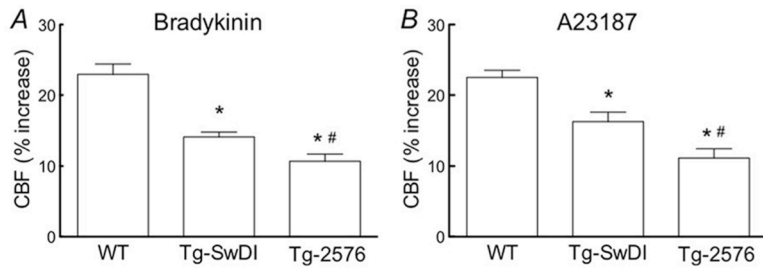

**Supplemental figure 2**

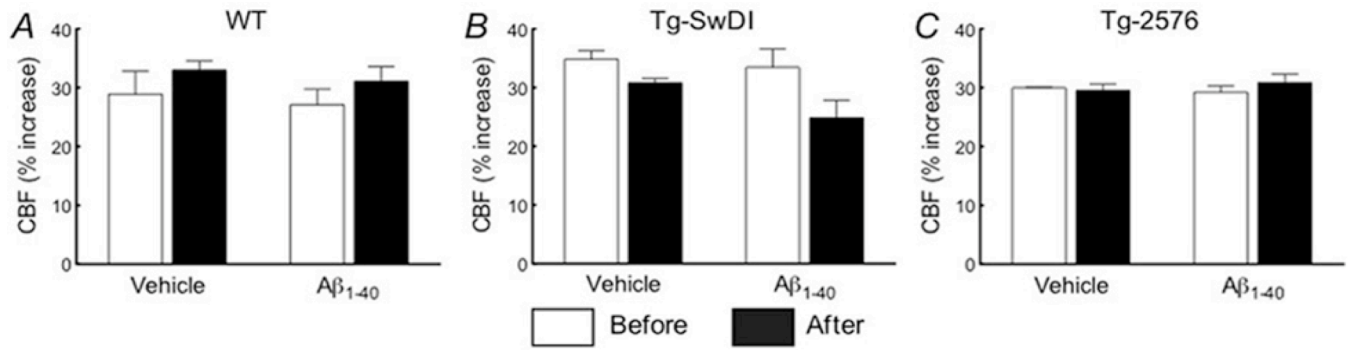

Supplement: NIHMS425912-supplement-1.pdf [file NIHMS425912-supplement-1.pdf]
